# Supplementary material
Source: HighWire-hosted journal article supplement (https://spcare.bmj.com/content/6/3/344)
Supplement: inline-supplementary-material-1 [file inline-supplementary-material-1.pdf]

## Figure 1. Overview of patients and data collection<sup>1</sup>

The figure depicts only those questions used in this paper. A complete matrix of the EPCRC model and patient attrition at each step is reported previously [18,19].

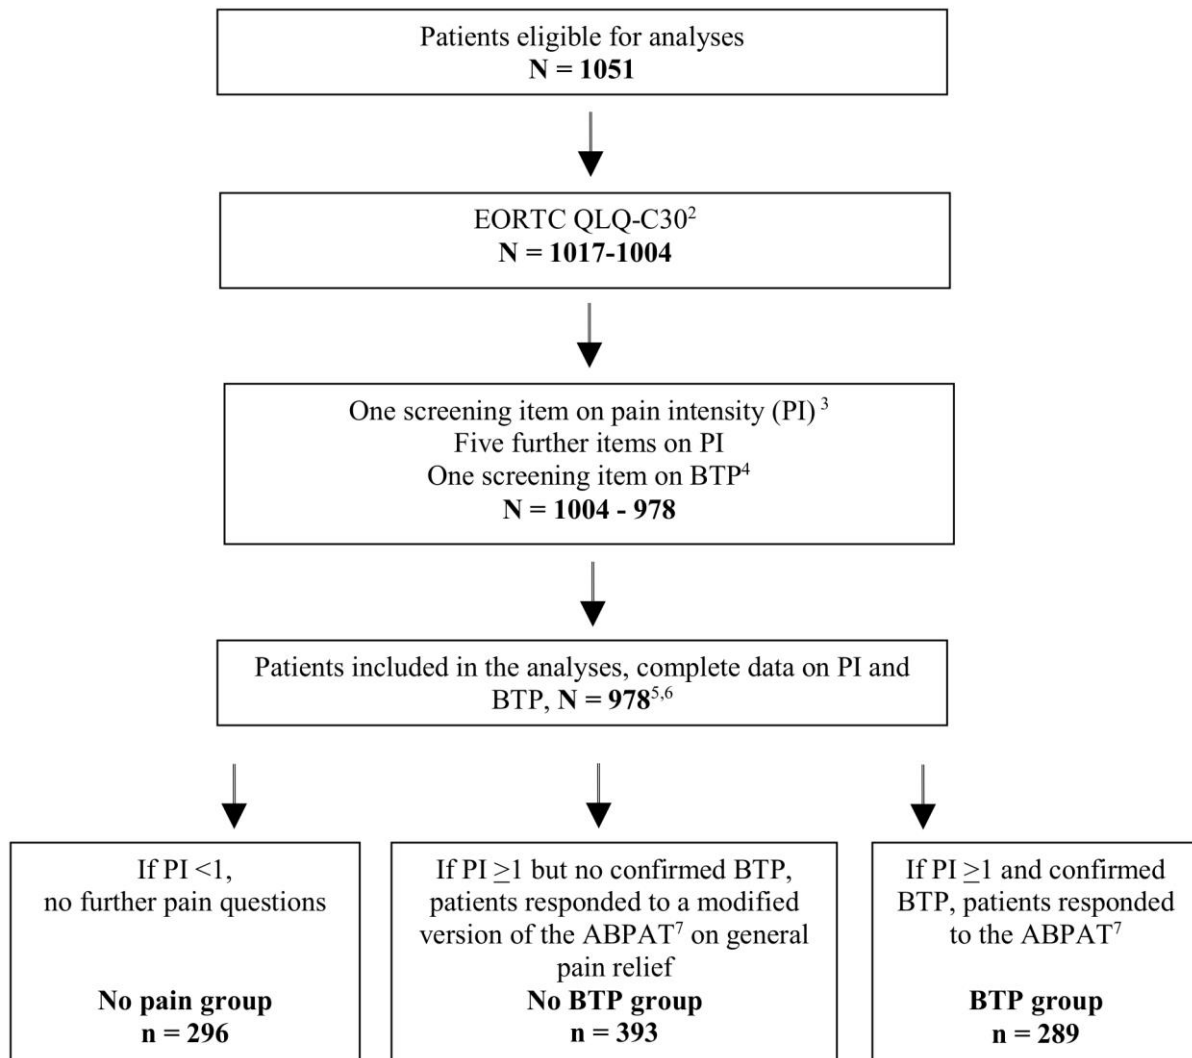

<sup>2</sup> To be answered by all; European Organisation for Research and Treatment of Cancer Core Quality of Life Questionnaire [22]

<sup>3</sup> To be answered by all; one PI screening item from Brief Pain Inventory [12]; “worst pain >1 last 24 hours, scored on a 0-10 numerical rating scale; *no pain –pain as bad as you can imagine*.”

<sup>4</sup> Another five PI questions from the BPI; average pain last 24 hours, and worst and average pain last two days and last week;

<sup>5</sup> Contingency question on BTP, presented to those who reported  $PI \geq 1$  on the pain screening question: “Have you had flare-ups of breakthrough pain in the last 24 hours?” Dichotomized as Yes / No.

<sup>6</sup> After the PI and BTP screening items, there were different paths automatically selected by the computer, that resulted in the following three groups; No pain group, no BTP group and BTP group

<sup>7</sup> Alberta Breakthrough Pain Assessment Tool [14]
